# Supplementary material
Source: Springer Nature journal article supplement (https://www.springermedizin.de/resource/supplementary/12967_2011_728_MOESM3_ESM.pdf/9577356)

**A.**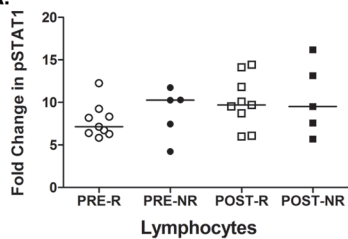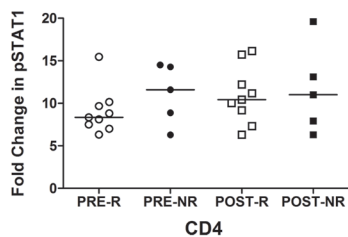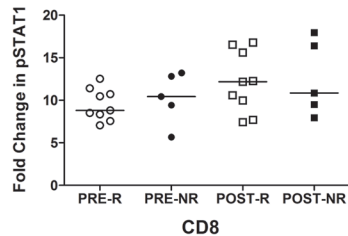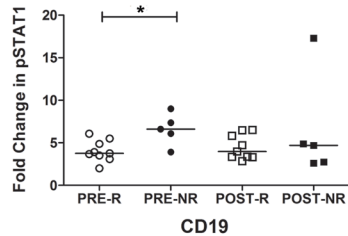**B.**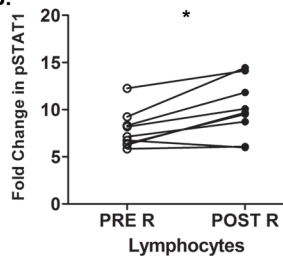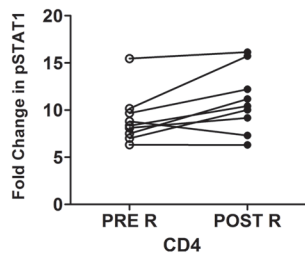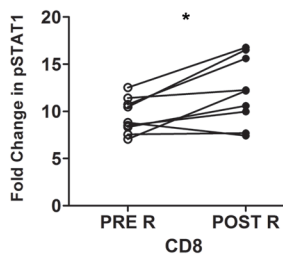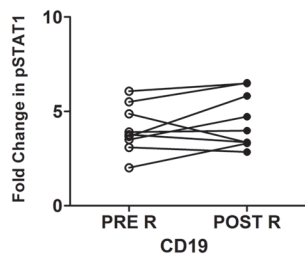**C.**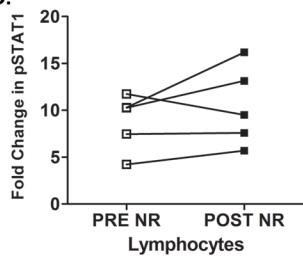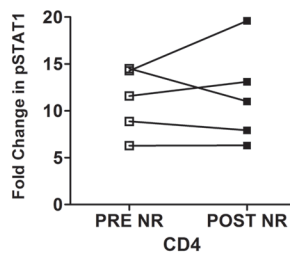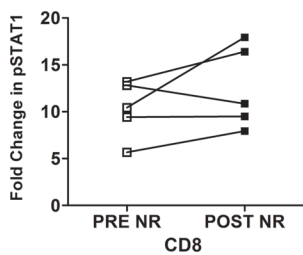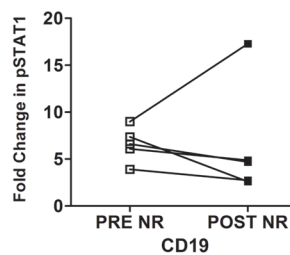

Supplement: MOESM3 [file 9577356]
